# Supplementary material for: A new restriction effect of hard templates for the shrinkage of mesoporous polymer during carbonization
Source: Royal Society of Chemistry journal article supplement (doi:10.1039/b910128d), 2009-01-01
Supplement: b910128d.pdf [file b910128d.pdf]

## Supplemently Information

### **A new restriction effect of hard templates for the shrinkage of mesoporous polymer during carbonization**

Mingbo Zheng,<sup>a</sup> Guangbin Ji,<sup>a</sup> Yongwen Wang,<sup>a</sup> Jian Cao,<sup>a</sup> Shaoqing Feng,<sup>a</sup> Lei Liao,<sup>b</sup> Qinglai Du,<sup>a</sup>  
Lifeng Zhang,<sup>a</sup> Zongxin Ling,<sup>a</sup> Jinsong Liu,<sup>a</sup> Ting Yu,<sup>b</sup> Jieming Cao\*<sup>a</sup> and Jie Tao<sup>a</sup>

*Nanomaterials Research Institute, College of Materials Science and Technology, Nanjing University of  
Aeronautics and Astronautics, Nanjing 210016, China; Division of Physics and Applied Physics, School  
of Physical and Mathematical Sciences, Nanyang Technological University, 637371, Singapore*

<sup>a</sup> Nanjing University of Aeronautics and Astronautics.

<sup>b</sup> Nanyang Technological University.

\*E-mail: jmcao@nuaa.edu.cn

#### **Experimental Details:**

##### **Preparation of anodic aluminum oxide (AAO) membrane:**

The AAO membranes with average pore diameters of 50, 90, and 200 nm were prepared by ourselves. The aluminium foil (purity 99.5%) was anodized in 0.5 mol/L of oxalic acid solution or 0.36 mol/L of phosphoric acid solution. The AAO membranes with an average pore diameter of 300 nm was purchased from Whatman Ltd.

##### **Preparation of SiO<sub>2</sub> colloidal crystal:**

Nearly monodisperse SiO<sub>2</sub> microspheres with an average diameter of 220 nm were synthesized by hydrolyzing tetraethyl orthosilicate (TEOS) and subsequent seed growth polymerization under basic conditions.<sup>[1]</sup> SiO<sub>2</sub> colloidal crystal was obtained by self-assembling SiO<sub>2</sub> microspheres using a vertical deposition technique. The SiO<sub>2</sub> colloidal crystal was heat-treated at 800 °C for 3 h. The heat treatment

endows the colloidal crystal with high mechanical strength and forms small necks between neighboring SiO<sub>2</sub> spheres.

**Preparation of resol precursor:**

The preparation of resol precursor is similar to that reported by Meng. Y et al<sup>[2,3]</sup>. 2.44 g of phenol was melted at 41 °C in a rockered flask. 2.6 g of 20 wt % NaOH solution was added to the flask. Then 4.2 g of formalin (37 wt % formaldehyde) was added dropwise at 41 °C and the reaction mixture was stirred at 70 °C for 1 h. After cooling to the room temperature, the pH of the mixture was adjusted to 7.0 using 0.6 mol/L of HCl solution. Water was then removed by vacuum evaporation at 43 °C. The final product was dissolved in 36.0 g of ethanol. 40.0 g of resol–ethanol solution was obtained.

**Preparation of Pluronic F127 (EO<sub>106</sub>PO<sub>70</sub>EO<sub>106</sub>)–resol mixture solution for AAO template:**

1.0 g of Pluronic F127 was dissolved in 20.0 g of ethanol. Then, 20.0 g of resol–ethanol solution was added. After stirring for 10 min, a homogeneous mixture solution was obtained.<sup>[2,3]</sup>

**Preparation of Pluronic F127–resol mixture solution for SiO<sub>2</sub> colloidal crystal template:**

1.0 g of Pluronic F127 was dissolved in 20.0 g of ethanol. Then, 10.0 g of resol–ethanol solution was added. After stirring for 10 min, a homogeneous mixture solution was obtained.<sup>[2,3]</sup>

**Preparation of mesoporous–macroporous carbon (MMC) and mesoporous–macroporous polymer (MMP):**

The precursor solution was transferred to an evaporating dish. Then, SiO<sub>2</sub> colloidal crystal template was added to the solution. After ethanol evaporated thoroughly at room temperature, the complex of SiO<sub>2</sub>–resol–F127 was taken out and heated at 100 °C for 24 h. Some of the complex were carbonized at 900 °C in N<sub>2</sub> for 3 h (heating rate: 1 °C/min). Some of the complex were carbonized at 700 °C in N<sub>2</sub> for 3

h. The others were heat treated at 350 °C in N<sub>2</sub> for 3 h. The SiO<sub>2</sub> templates were then etched away with 10% aqueous HF. The corresponding products were MMC-900, MMC-700, and MMP-350, respectively. Furthermore, some of MMP-350 were carbonized at 700 °C in N<sub>2</sub> for 3 h and the obtained product was MMC-350-700.

### **Instrumentations:**

The morphologies of the mesoporous nanofibers were examined by transmission electron microscopy (FEI TECNAI-20) and scanning electron microscopy (Gemini, LEO1530). The N<sub>2</sub> adsorption–desorption analysis was measured on a Micromeritics ASAP 2010 instrument. The plan-view TEM sample of AAO–MCNF-700 was prepared by dimple grinding followed by ion polishing (Gatan PIPS 691) and characterized by transmission electron microscopy (JEOL JEM-2010FEF). The Raman spectra was carried out with a WITEC CRM200 confocal Raman system.

**Table S1.** Textural Properties of Mesoporous Materials

| sample name               | mesopore size [nm] | BET surface area [m <sup>2</sup> g <sup>-1</sup> ] | micropore area [m <sup>2</sup> g <sup>-1</sup> ] | pore volume <sup>a</sup> [cm <sup>3</sup> g <sup>-1</sup> ] | micropore volume <sup>b</sup> [cm <sup>3</sup> g <sup>-1</sup> ] |
|---------------------------|--------------------|----------------------------------------------------|--------------------------------------------------|-------------------------------------------------------------|------------------------------------------------------------------|
| MCNF-700 (90 nm)          | 15.2               | 1154                                               | 246                                              | 3.44                                                        | 0.12                                                             |
| MPNF-350 (90 nm)          | 11.1               | 783                                                | 292                                              | 2.04                                                        | 0.14                                                             |
| MCNF-350-700 (90 nm)      | 7.3                | 1308                                               | 1032                                             | 2.19                                                        | 0.51                                                             |
| MCNF-700 (50 nm)          | 14.6               | 999                                                | 290                                              | 2.70                                                        | 0.14                                                             |
| MPNF-350 (50 nm)          | 9.5                | 642                                                | 113                                              | 1.41                                                        | 0.05                                                             |
| MCNF-350-700 (50 nm)      | 6.5                | 907                                                | 464                                              | 1.28                                                        | 0.23                                                             |
| MCNF-700 (200 nm)         | 12.7               | 1232                                               | 343                                              | 2.69                                                        | 0.16                                                             |
| MPNF-350 (200 nm)         | 10.6               | 854                                                | 270                                              | 1.30                                                        | 0.13                                                             |
| MCNF-350-700 (200 nm)     | 7.6                | 1766                                               | 1225                                             | 1.38                                                        | 0.60                                                             |
| MCNF-700 (300 nm)         | 11.4               | 1300                                               | 516                                              | 2.35                                                        | 0.25                                                             |
| MPNF-350 (300 nm)         | 9.5                | 696                                                | 241                                              | 1.05                                                        | 0.12                                                             |
| FDU-16-350 <sup>[3]</sup> | 6.6                | 460                                                | 230                                              | 0.34                                                        |                                                                  |
| FDU-16-700 <sup>[3]</sup> | 3.8                | 690                                                | 480                                              | 0.37                                                        |                                                                  |
| MMC-900                   | 14.9               | 1469                                               | 409                                              | 4.11                                                        | 0.20                                                             |
| MMC-700                   | 14.8               | 1243                                               | 333                                              | 3.49                                                        | 0.16                                                             |
| MMP-350                   | 11.4               | 872                                                | 216                                              | 1.61                                                        | 0.10                                                             |
| MMC-350-700               | 8.7                | 1291                                               | 613                                              | 1.99                                                        | 0.30                                                             |
| FDU-15-350                | 5.6                | 323                                                | 46                                               | 0.34                                                        | 0.02                                                             |
| FDU-15-700                | 3.2                | 648                                                | 381                                              | 0.37                                                        | 0.19                                                             |
| FDU-15-900                | 2.9                | 673                                                | 446                                              | 0.36                                                        | 0.22                                                             |

<sup>a</sup> By using the Barrett-Joyner-Halenda (BJH) model, the pore volume was derived from the adsorption branch of isotherms and estimated from the adsorbed amount at a relative pressure  $P/P_0$  of 0.996.

<sup>b</sup> The micropore volume was calculated by the  $V-t$  method.

**Figure S1-Figure S14**

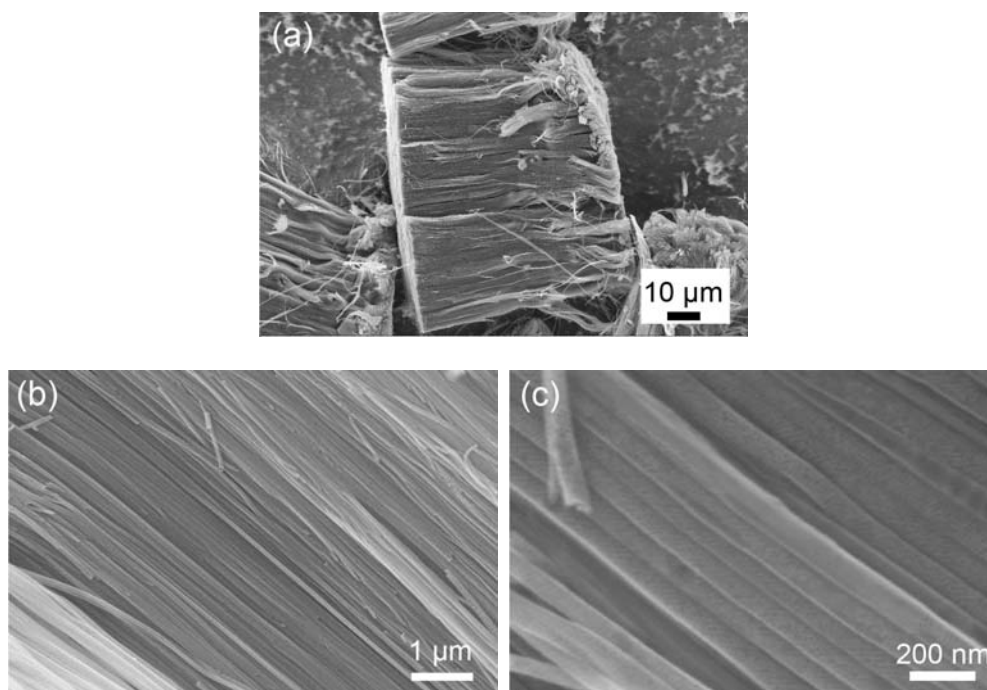

**Figure S1.** SEM images of MCNF-700 obtained by using AAO with an average pore diameter of 90 nm as template.

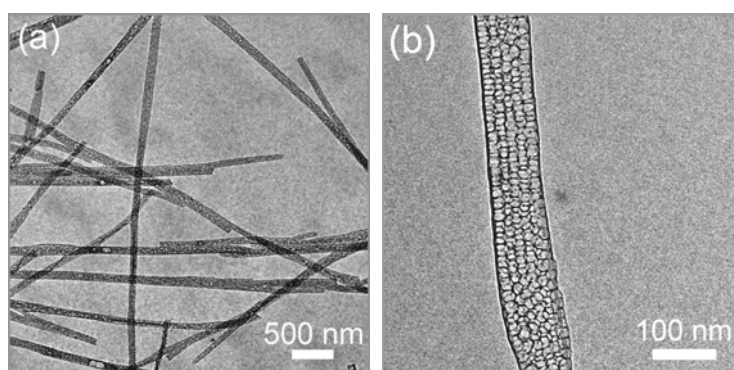

**Figure S2.** Low-magnification TEM images of MCNF-700 obtained by using AAO with an average pore diameter of 90 nm as template.

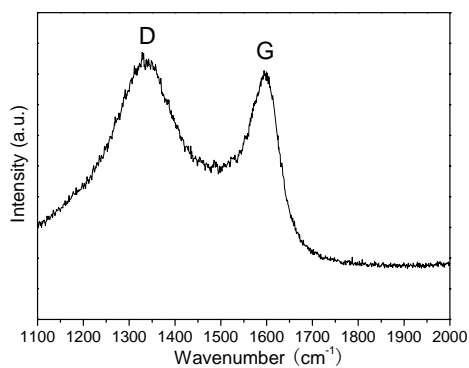

**Figure S3.** Raman spectra of MCNF-700 obtained by using AAO with an average pore diameter of 90 nm as template. (The Raman spectra of MCNF-700 shows two characteristic vibration modes at about 1340 and 1595 cm<sup>-1</sup>, respectively. It suggests that MCNF-700 has a low degree of graphitization.)

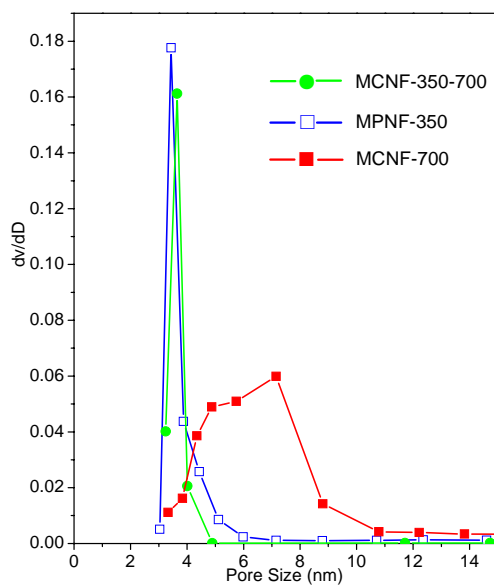

**Figure S4.** BJH pore size distribution curves from desorption branches for MCNF-700, MPNF-350 and MCNF-350-700 obtained by using AAO with an average pore diameter of 90 nm as template.

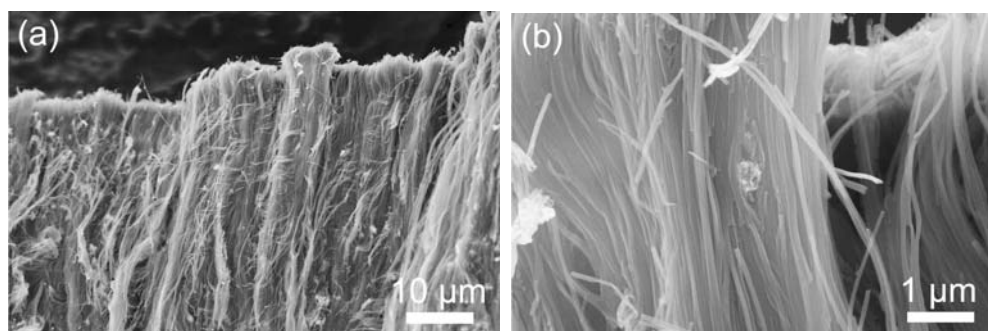

**Figure S5.** SEM images of MCNF-700 obtained by using AAO with an average pore diameter of 50 nm as template.

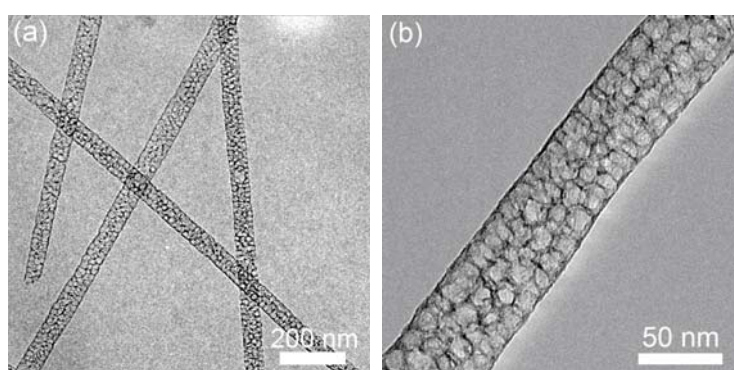

**Figure S6.** TEM images of MCNF-700 obtained by using AAO with an average pore diameter of 50 nm as template.

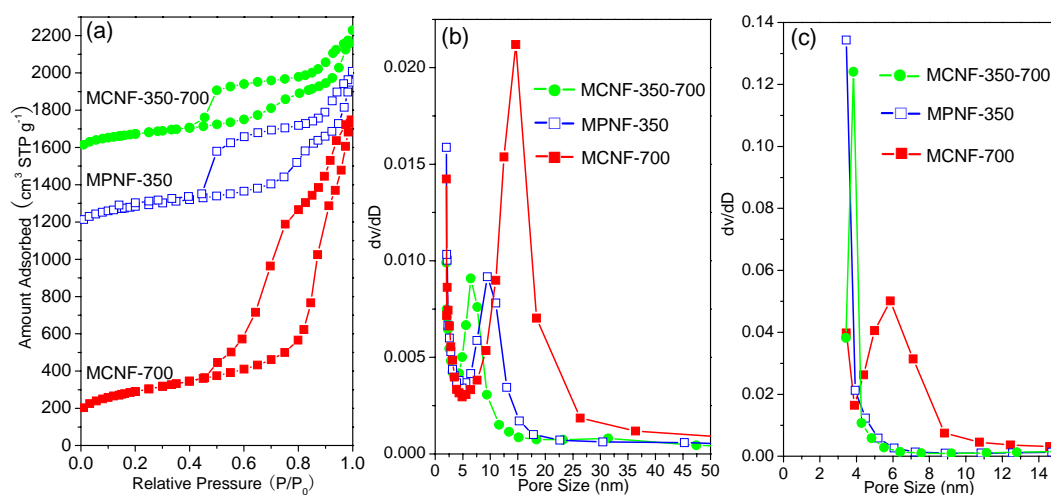

**Figure S7.** (a) N<sub>2</sub> adsorption–desorption isotherms, (b) BJH pore size distribution curves from adsorption branches, and (c) BJH pore size distribution curves from desorption branches for MCNF-700, MPNF-350, and MCNF-350-700 obtained by using AAO with an average pore diameter of 50 nm as template. The isotherms of MPNF-350 and MCNF-350-700 are offset vertically by 1100 and 1400 cm<sup>3</sup>/g, respectively.

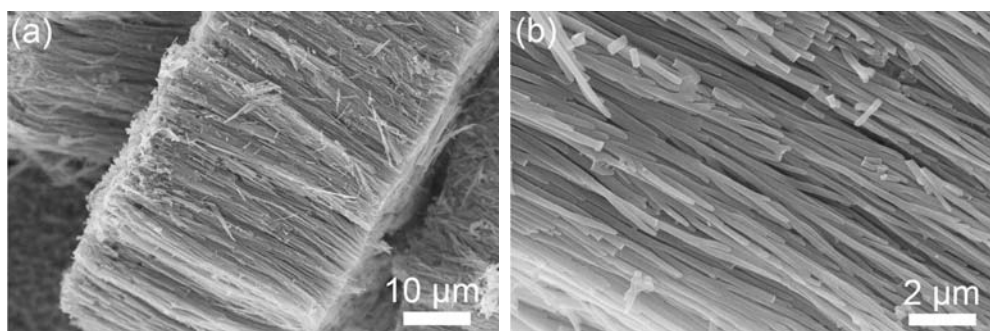

**Figure S8.** SEM images of MCNF-700 obtained by using AAO with an average pore diameter of 200 nm as template.

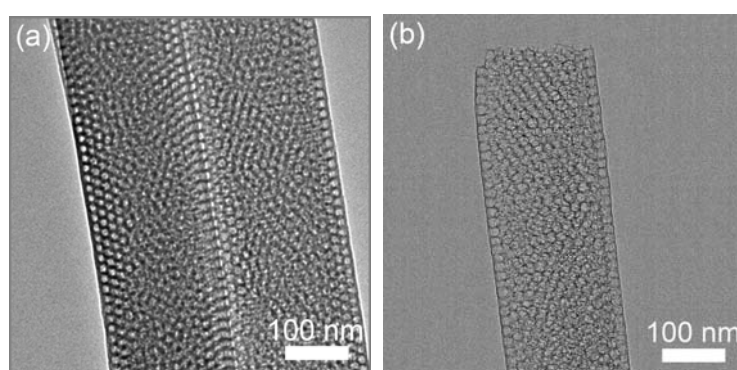

**Figure S9.** TEM images of MPNF-350 (a) and MCNF-700 (b) obtained by using AAO with an average pore diameter of 200 nm as template.

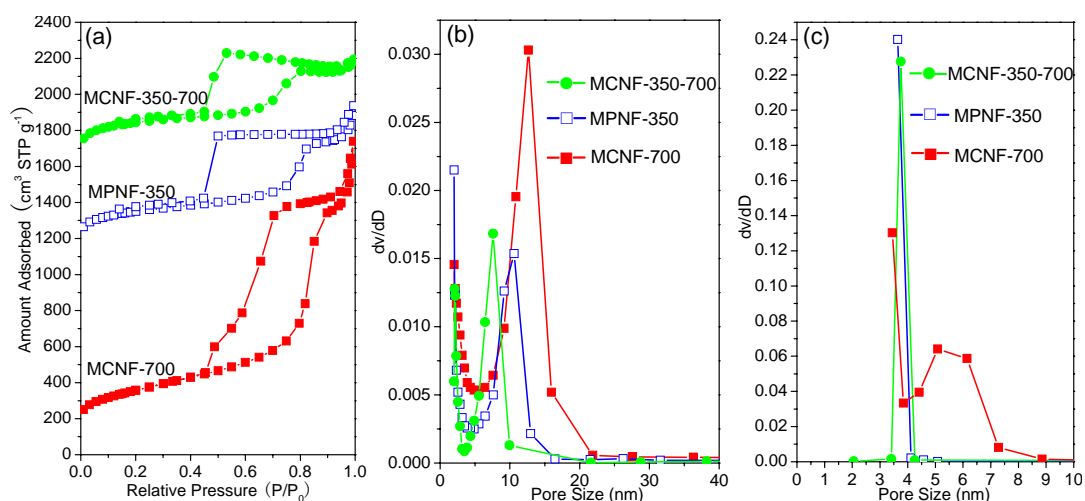

**Figure S10.** (a)  $N_2$  adsorption–desorption isotherms, (b) BJH pore size distribution curves from adsorption branches, and (c) BJH pore size distribution curves from desorption branches for MCNF-700, MPNF-350, and MCNF-350-700 obtained by using AAO with an average pore diameter of 200 nm as template. The isotherms of MPNF-350 and MCNF-350-700 are offset vertically by 1100 and 1300  $cm^3/g$ , respectively.



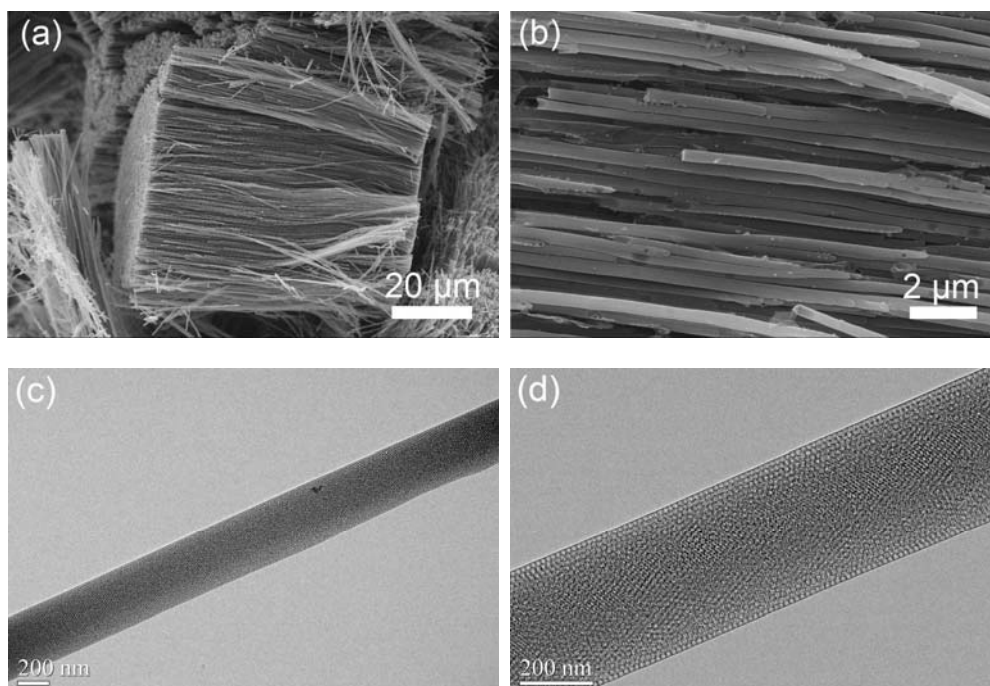

**Figure S11.** SEM (a,b) and TEM (c,d) images of MCNF-700 obtained by using AAO with an average pore diameter of 300 nm as template.

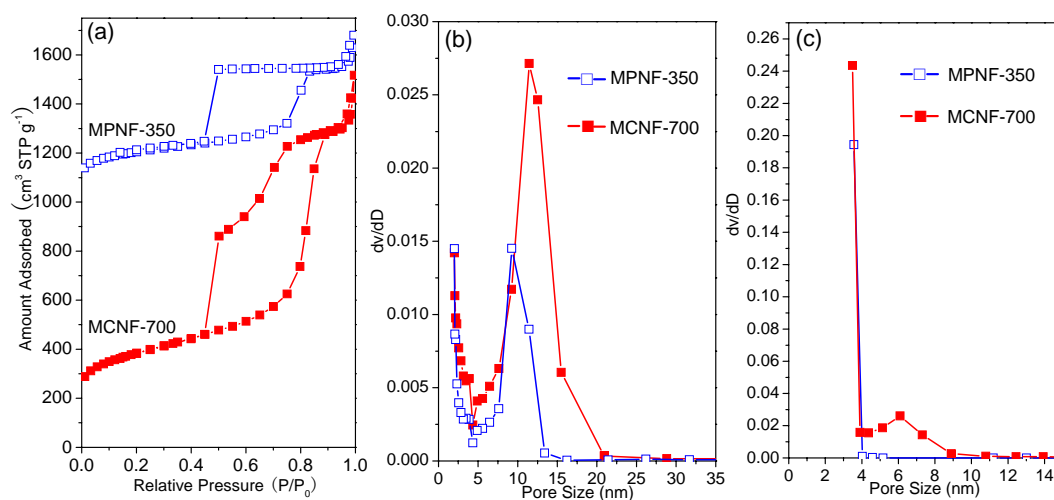

**Figure S12.** (a)  $N_2$  adsorption–desorption isotherms, (b) BJH pore size distribution curves from adsorption branches, and (c) BJH pore size distribution curves from desorption branches for MCNF-700 and MPNF-350 obtained by using AAO with an average pore diameter of 300 nm as template. The isotherms of MPNF-350 are offset vertically by  $1000 \text{ cm}^3/\text{g}$ . (Figure c indicates that the window of the mesopores was not opened completely, which is due to the restriction effect weakens with increasing the pore diameter of AAO template.)

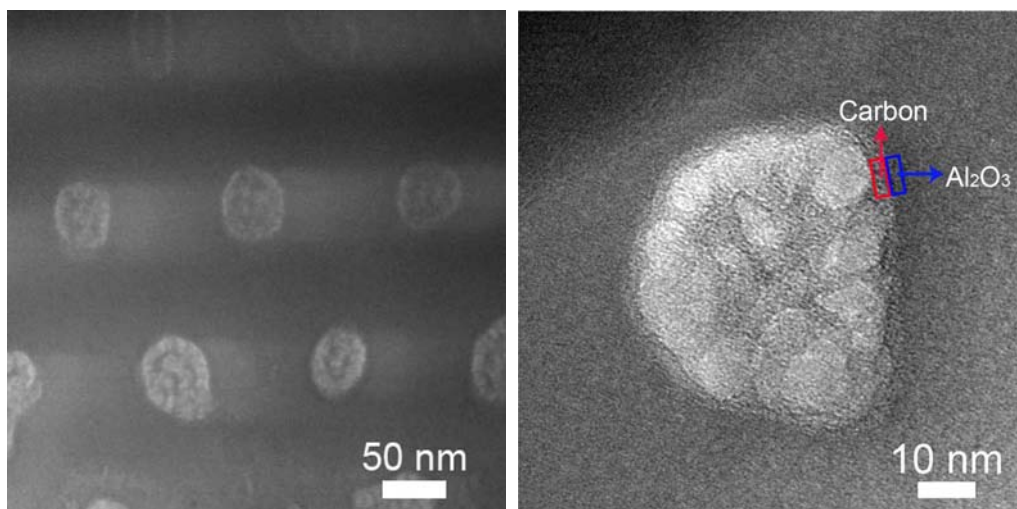

**Figure S13.** Plan-view TEM images of AAO–MCNF-700 complex obtained by using AAO with an average pore diameter of 50 nm as template. (From the high-magnification TEM image (right), we can see that the surface of the carbon nanofiber connected tightly with the surface of the pore wall of AAO after carbonization at 700 °C)

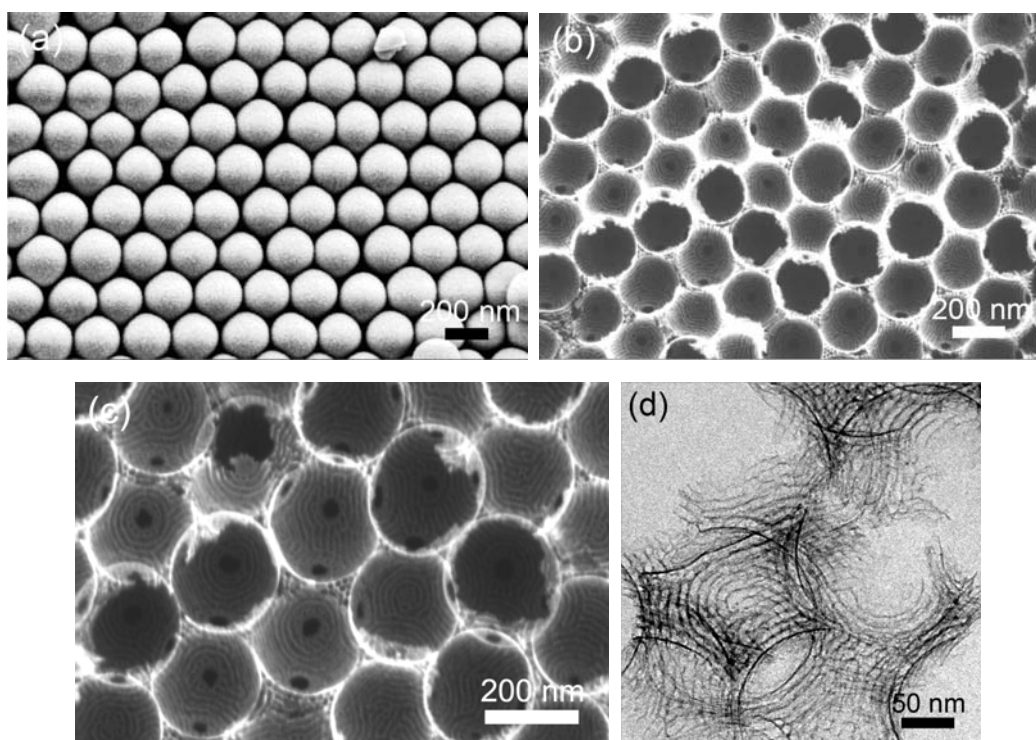

**Figure S14.** SEM images of SiO<sub>2</sub> colloidal crystal (a) and MMC-700 (b,c), TEM image of MMC-700 (d).

### References:

- [1] Stöber, W.; Fink, A.; Bohn, E. *J. Colloid Interface Sci.* **1968**, *26*, 62.
- [2] Meng, Y.; Gu, D.; Zhang, F.; Shi, Y.; Yang, H.; Tu, B.; Yu, C.; Zhao, D. *Angew. Chem., Int. Ed.* **2005**, *44*, 7053.
- [3] Meng, Y.; Gu, D.; Zhang, F.; Shi, Y.; Cheng, L.; Feng, D.; Wu, Z.; Chen, Z.; Wan, Y.; Stein, A.; Zhao, D. *Chem. Mater.* **2006**, *18*, 4447
